# Supplementary material for: Analyzing the Relationship between Participation in Sports and Harmful Alcohol Drinking in Early Adolescence: Two-Year Prospective Analysis
Source: MDPI journal article supplement (doi:10.3390/children10061065), 2023-06-15
Supplement: s1 [file s1]

## ***Alcohol Use Disorders Identification Test (AUDIT)***

---

Please read the questions on the left, and encircle correct answer on the right. After answering the first question please read notation at the bottom of the Table

**Table S1: AUDIT scale.**

|                                                                                                                                        |        |                   |                               |                  |                           |
|----------------------------------------------------------------------------------------------------------------------------------------|--------|-------------------|-------------------------------|------------------|---------------------------|
| <b>1. How often do you have a drink containing alcohol?</b>                                                                            | Never  | Monthly or less   | 2-4 times a month             | 2-3 times a week | 4 or more times a week    |
| <b>2. How many standard drinks containing alcohol do you have on a typical day when drinking?</b>                                      | 1 or 2 | 3 or 4            | 5 or 6                        | 7 to 9           | 10 or more                |
| <b>3. How often do you have six or more drinks on one occasion?</b>                                                                    | Never  | Less than monthly | Monthly                       | Weekly           | Daily or almost daily     |
| <b>4. During the past year, how often have you found that you were not able to stop drinking once you had started?</b>                 | Never  | Less than monthly | Monthly                       | Weekly           | Daily or almost daily     |
| <b>5. During the past year, how often have you failed to do what was normally expected of you because of drinking?</b>                 | Never  | Less than monthly | Monthly                       | Weekly           | Daily or almost daily     |
| <b>6. During the past year, how often have you needed a drink in the morning to get yourself going after a heavy drinking session?</b> | Never  | Less than monthly | Monthly                       | Weekly           | Daily or almost daily     |
| <b>7. During the past year, how often have you had a feeling of guilt or remorse after drinking?</b>                                   | Never  | Less than monthly | Monthly                       | Weekly           | Daily or almost daily     |
| <b>8. During the past year, have you been unable to remember what happened the night before because you had been drinking?</b>         | Never  | Less than monthly | Monthly                       | Weekly           | Daily or almost daily     |
| <b>9. Have you or someone else been injured as a result of your drinking?</b>                                                          | No     |                   | Yes, but not in the past year |                  | Yes, during the past year |
| <b>10. Has a relative or friend, doctor or other health worker been concerned about your drinking or suggested you cut down?</b>       | No     |                   | Yes, but not in the past year |                  | Yes, during the past year |

*Note: If answered "Never" on first question, please proceed to questions 9 and 10*
